# Supplementary material for: Validation of the Social Responsiveness Scale (SRS) to screen for atypical social behaviors in juvenile macaques
Source: PubMed Central journal article supplement (PMC8136728; doi:10.1371/journal.pone.0235946), 2021-05-20
Supplement: pone.0235946.s002.pdf [file pone.0235946.s002.pdf]

|                                           |                  |                           | jmSRS Factors   |                  |                  |                 |
|-------------------------------------------|------------------|---------------------------|-----------------|------------------|------------------|-----------------|
|                                           |                  |                           | FACTOR #1       | FACTOR #2        | FACTOR #3        | FACTOR #4       |
| O<br>b<br>s<br>e<br>r<br>v<br>e<br>r<br>s | Groom soliciting | Spearman's rho<br>p value | 0.200<br>0.060  | 0.358**<br>0.001 | 0.195<br>0.067   | 0.258*<br>0.015 |
|                                           | Eye-gaze         | Spearman's rho<br>p value | 0.129<br>0.230  | 0.22*<br>0.039   | 0.174<br>0.102   | 0.093<br>0.385  |
|                                           | Grooming         | Spearman's rho<br>p value | -0.176<br>0.094 | 0.013<br>0.901   | -0.160<br>0.132  | 0.136<br>0.200  |
|                                           | Solitary play    | Spearman's rho<br>p value | 0.172<br>0.103  | 0.304**<br>0.004 | 0.154<br>0.147   | 0.238*<br>0.023 |
|                                           | Display          | Spearman's rho<br>p value | -0.040<br>0.710 | -0.038<br>0.723  | 0.036<br>0.738   | 0.190<br>0.074  |
|                                           | Follow           | Spearman's rho<br>p value | 0.124<br>0.245  | 0.34**<br>0.001  | 0.094<br>0.378   | 0.097<br>0.361  |
|                                           | Leave behind     | Spearman's rho<br>p value | 0.162<br>0.122  | 0.322**<br>0.002 | 0.175<br>0.096   | 0.153<br>0.146  |
|                                           | Anxiety          | Spearman's rho<br>p value | 0.257*<br>0.014 | 0.231*<br>0.029  | 0.278**<br>0.008 | 0.269**<br>0.01 |
